# Supplementary material for: Protein Expression Knockdown in Cancer Cells Induced by a Gemini Cationic Lipid Nanovector with Histidine-Based Polar Heads
Source: PubMed Central journal article supplement (PMC7558209; doi:10.3390/pharmaceutics12090791), 2020-08-21
Supplement: pharmaceutics-12-00791-s001.pdf [file pharmaceutics-12-00791-s001.pdf]

# Supplementary Materials: Protein Expression Knockdown in Cancer Cells Induced by a Gemini Cationic Lipid Nanovector with Histidine-Based Polar Heads

Natalia Sánchez-Arribas, María Martínez-Negro, Eva M. Villar, Lourdes Pérez, José Osío Barcina, Emilio Aicart, Pablo Taboada, Andrés Guerrero-Martínez and Elena Junquera

## 1. In vitro studies:

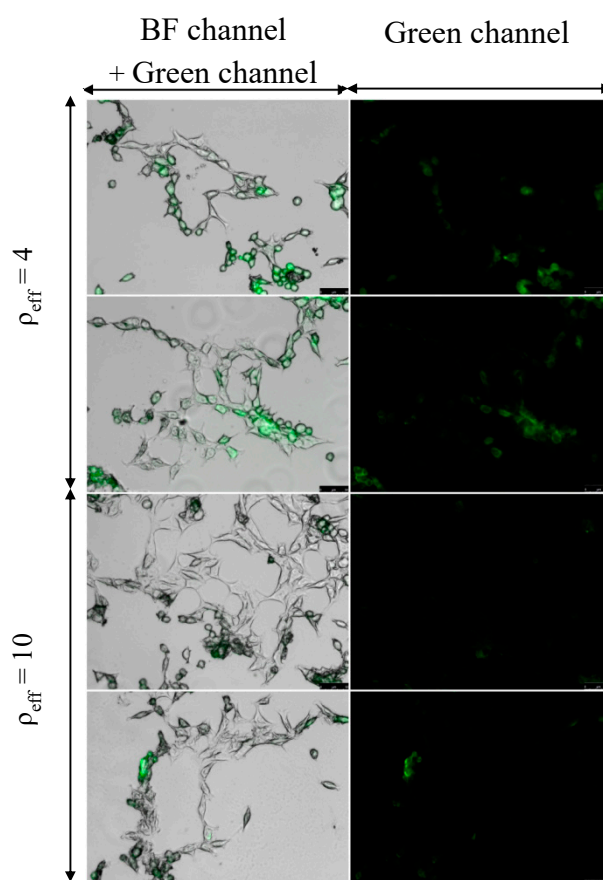

**Figure S1.** Epifluorescence microscopy images: Merged images (bright field (BF) + green fluorescence channel (left)) and green fluorescence channel (right) for HeLa-GFP cells treated with  $C_3(C_{16}His)_2/MOG$ -siRNA lipoplexes ( $\alpha = 0.2$ ;  $\rho_{\text{eff}} = 4$  and 10) in the presence of 10% (*v/v*) of HS, after 72 h of incubation. Scale bars are 50  $\mu\text{m}$ . The % GFP values estimated by ImageJ were 52 and 48% at  $\rho_{\text{eff}} = 4$  (row 1 and 2, respectively) and 14 and 16% at  $\rho_{\text{eff}} = 10$  (row 3 and 4, respectively).

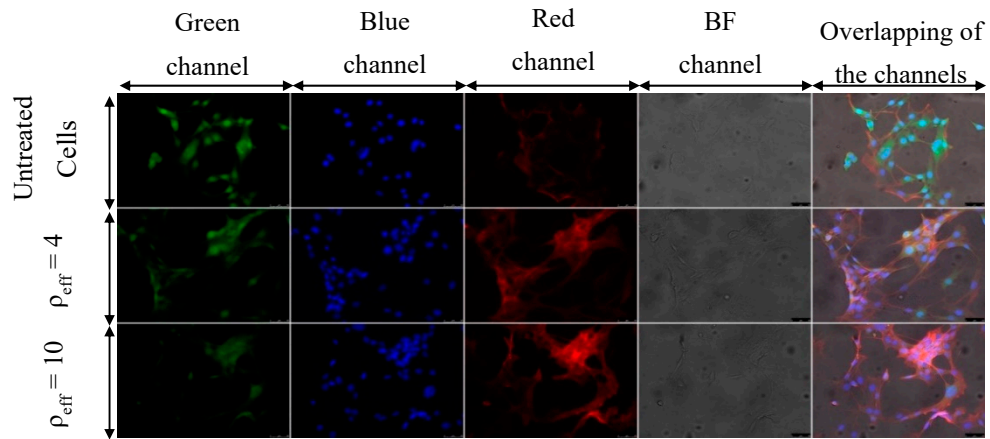

**Figure S2.** Epifluorescence microscopy images for T731-GFP cells treated with  $C_3(C_{16}His)_2/MOG$ -siRNA lipoplexes ( $\alpha = 0.2$ ;  $\rho_{\text{eff}} = 4$  and 10) in the presence of 10% (*v/v*) of HS, after 72 h of incubation. Images were collected in different channels of fluorescence signals and the overlapping of them. Scale bars are 50  $\mu\text{m}$ . The % GFP values estimated by ImageJ were 69% at  $\rho_{\text{eff}} = 4$  (row 2) and 31% at  $\rho_{\text{eff}} = 10$  (row 3).

## 2. Protein corona studies

**Table S1.** Relative percentage of proteins classified by their physiological function, by their MW in kDa and by their pI about pie charts in Figure 6.

| Physiological Function | %     | MW      | %     | pI    | %     |
|------------------------|-------|---------|-------|-------|-------|
| Lipoproteins           | 34.98 | >300    | 1.35  | >9    | 0.32  |
| Acute-phase            | 20.95 | 150-300 | 7.41  | 08_09 | 15.26 |
| Immunoglobulins        | 16.48 | 100-150 | 3.41  | 07_08 | 14.84 |
| Tissue Leakage         | 3.17  | 80-100  | 1.45  | 06_07 | 32.18 |
| Coagulation            | 6.67  | 70-80   | 3.64  | 05_06 | 36.63 |
| Complement             | 10.47 | 60-70   | 7.45  | <5    | 0.76  |
| Others                 | 7.27  | 50-60   | 6.88  |       |       |
|                        |       | 40-50   | 17.17 |       |       |
|                        |       | 30-40   | 19.40 |       |       |
|                        |       | 20-30   | 10.03 |       |       |
|                        |       | <20     | 21.81 |       |       |

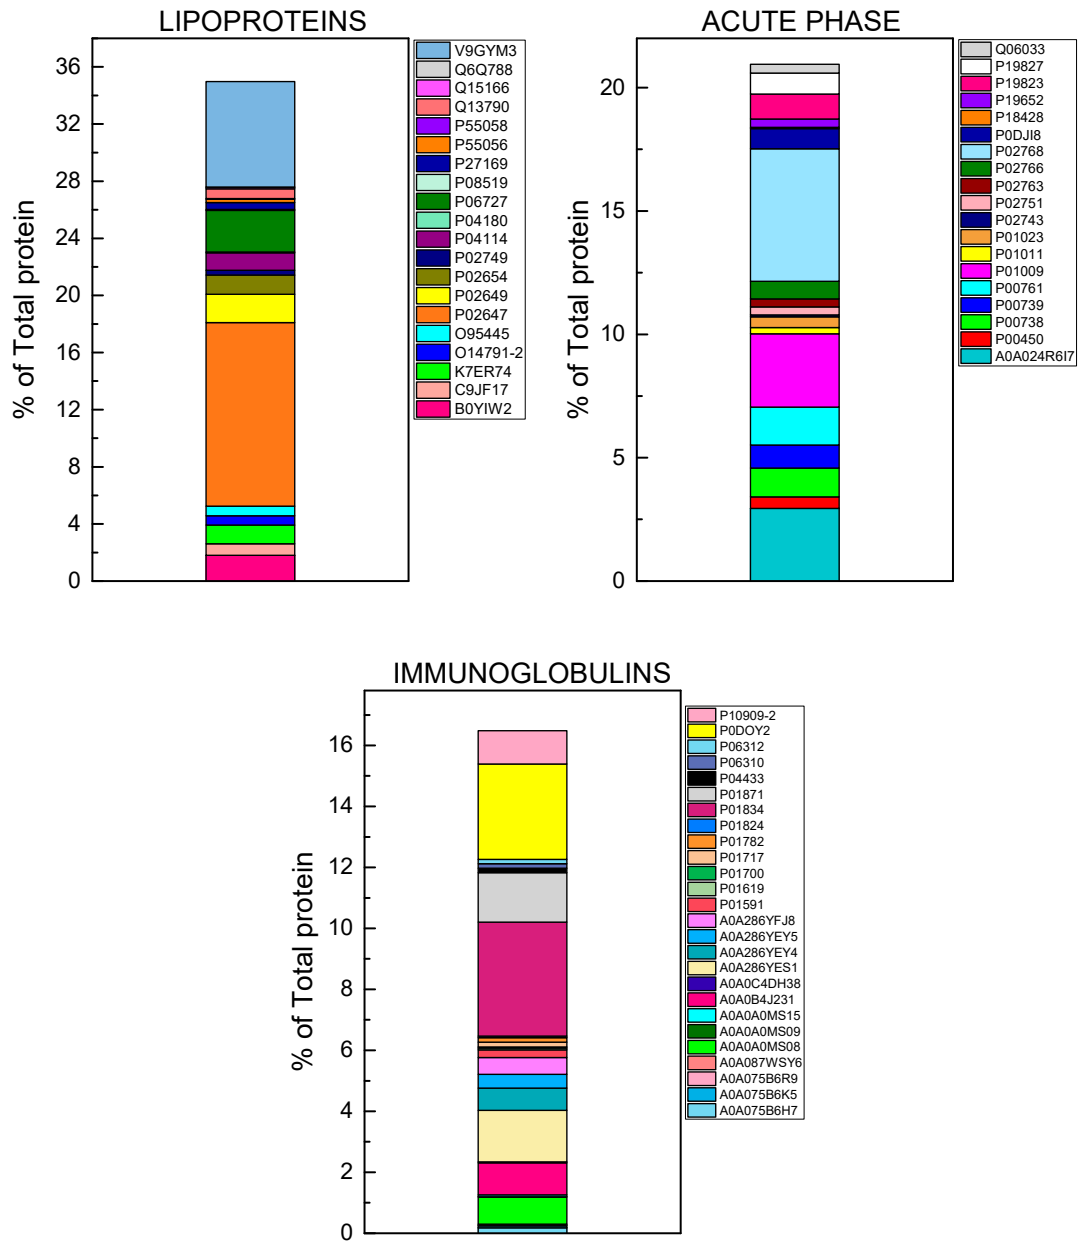

**Figure S3.** Classification of the most abundant proteins (lipoproteins, acute-phase and immunoglobulins proteins) found in the protein corona surrounding  $C_3(C_{16}His)_2$ /MOG-siRNA lipoplexes surfaces.

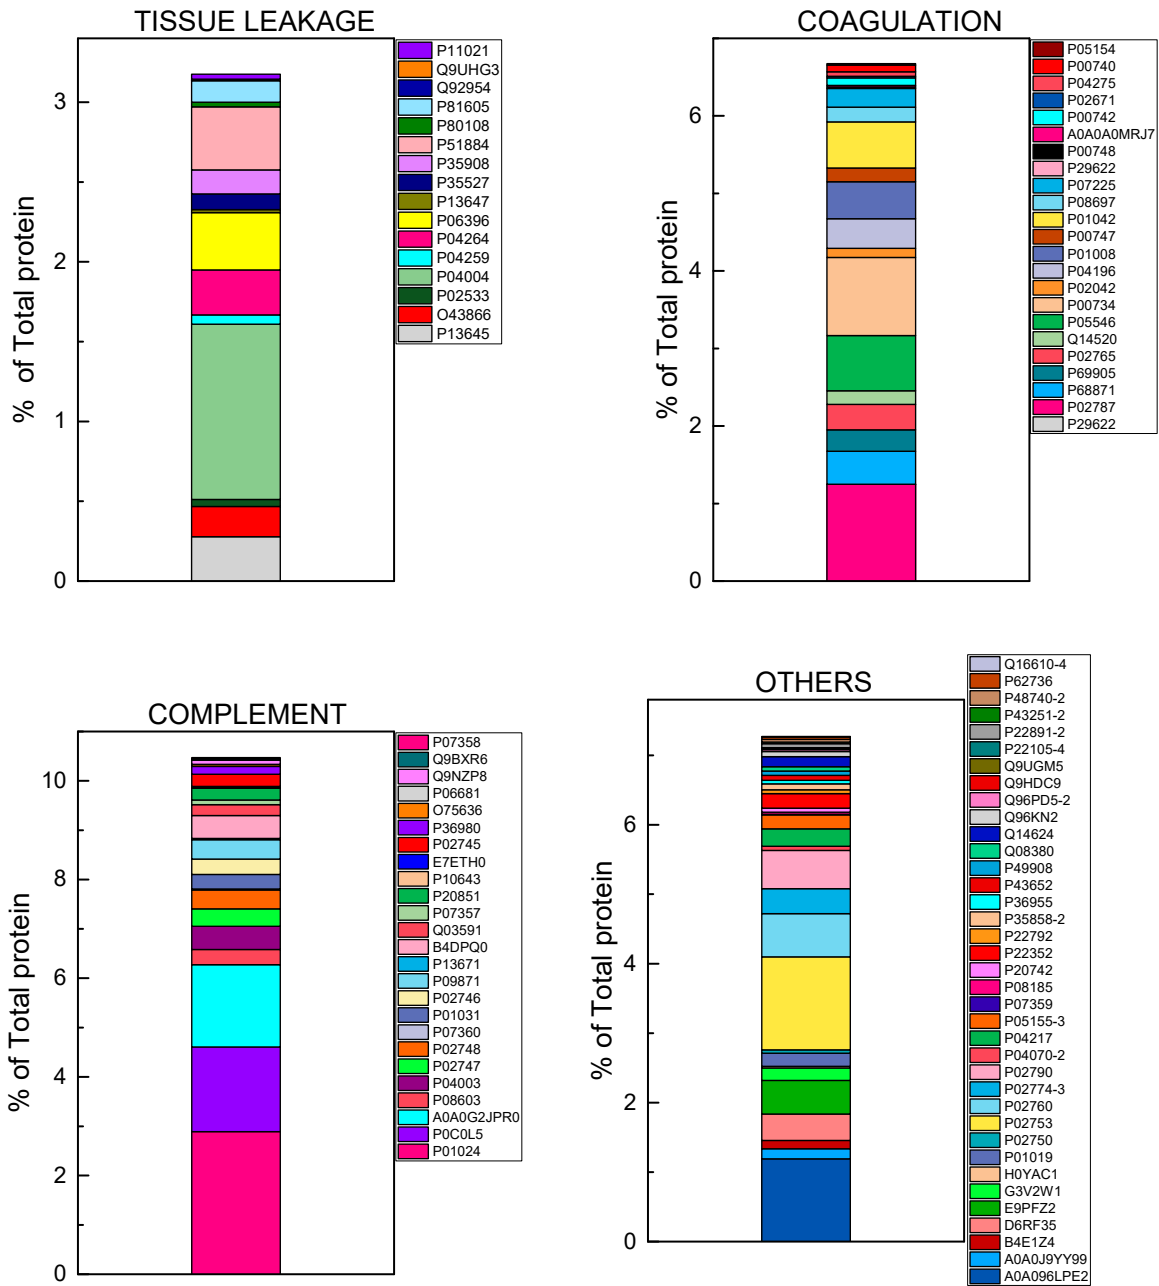

**Figure S4.** Classification of the proteins that constitute a minor fraction (tissue leakage, coagulation, complement and other proteins) present in the protein corona surrounding the  $C_3(C_{16}His)_2/MOG$ -siRNA lipoplexes surfaces.
